# Supplementary material for: Identification of useful genes from multiple microarrays for ulcerative colitis diagnosis based on machine learning methods
Source: PubMed Central journal article supplement (PMC9200771; doi:10.1038/s41598-022-14048-6), 2022-06-15
Supplement: 41598_2022_14048_MOESM1_ESM.pdf [file 41598_2022_14048_MOESM1_ESM.pdf]

**OLFM4 and C4BPB, the Novel Diagnosis Gene Signatures and Immune  
Correlation for Ulcerative Colitis with Integrated Analysis of Multiple  
Microarray Studies**

## **Content**

**Table.1** The 87 differently expressed genes in healthy control and UC cohort.

**Table.2** The subsequently screened characteristic with LASSO regression.

**Fig.1** The six DGEs into ROC curve.

- A. The ROC curve of six DGEs in training group.
- B. The ROC curve of six DGEs in testing group.
- C. The ROC curve of six DGEs in GSE87473 group.

**Table.3** The immune correlation in OLFM4 and C4BPB.

**Table.1** The 87 differently expressed genes in healthy control and UC cohort.

| ID     | logFC        | AveExpr     | t        | P.Value  | adj.P.Val | B        |
|--------|--------------|-------------|----------|----------|-----------|----------|
| CLDN8  | -1.814768497 | 8.220200709 | -8.55781 | 5.52E-16 | 4.02E-13  | 25.69652 |
| TNNC1  | -1.601797172 | 6.62836574  | -5.09171 | 6.19E-07 | 9.74E-06  | 5.648968 |
| PCK1   | -1.285062472 | 8.185118102 | -5.76299 | 2.00E-08 | 5.62E-07  | 8.918545 |
| HOXB13 | -1.185806867 | 8.159745724 | -4.57725 | 6.84E-06 | 7.00E-05  | 3.374855 |
| AQP8   | -1.135774697 | 9.339402519 | -3.19403 | 0.001548 | 0.006196  | -1.66141 |
| CHAD   | -1.037824548 | 6.461571829 | -6.04223 | 4.38E-09 | 1.67E-07  | 10.37445 |
| GNA15  | 1.000727035  | 6.661748827 | 8.22617  | 5.48E-15 | 2.77E-12  | 23.47382 |
| RPN2   | 1.002700691  | 9.482332064 | 4.786774 | 2.63E-06 | 3.24E-05  | 4.275977 |
| ALDOB  | 1.011314262  | 7.655774452 | 4.701041 | 3.91E-06 | 4.47E-05  | 3.903048 |
| SPINK4 | 1.011902538  | 10.90435706 | 5.505221 | 7.77E-08 | 1.68E-06  | 7.62382  |
| ARPC3  | 1.012468505  | 10.74963032 | 5.212645 | 3.42E-07 | 5.78E-06  | 6.213246 |
| CD3D   | 1.014711335  | 8.053071243 | 5.096058 | 6.06E-07 | 9.58E-06  | 5.669046 |
| CXCL9  | 1.019692359  | 7.570292862 | 6.192167 | 1.89E-09 | 7.91E-08  | 11.17846 |
| OAZ1   | 1.027144405  | 12.19068367 | 5.88228  | 1.05E-08 | 3.40E-07  | 9.533823 |
| CCL21  | 1.029961601  | 7.449472391 | 4.277689 | 2.52E-05 | 0.000206  | 2.147826 |
| VOPP1  | 1.031978432  | 8.260436521 | 5.600779 | 4.73E-08 | 1.14E-06  | 8.098196 |
| TFF1   | 1.035156178  | 10.57514032 | 4.723279 | 3.53E-06 | 4.11E-05  | 3.999222 |
| MAP2K1 | 1.038879172  | 8.649711809 | 7.778124 | 1.12E-13 | 3.15E-11  | 20.56039 |
| MMP3   | 1.041428416  | 8.017028248 | 4.921956 | 1.40E-06 | 1.93E-05  | 4.875733 |
| CD55   | 1.045736346  | 8.761643023 | 7.636885 | 2.82E-13 | 6.20E-11  | 19.66433 |
| TCIRG1 | 1.051823225  | 7.982610792 | 7.32833  | 2.06E-12 | 3.38E-10  | 17.74577 |
| CSF2RB | 1.052976854  | 7.029487595 | 6.387306 | 6.21E-10 | 3.21E-08  | 12.24762 |
| GMFG   | 1.067327333  | 7.601801293 | 5.863688 | 1.17E-08 | 3.64E-07  | 9.437269 |
| IFITM1 | 1.074815632  | 10.48058717 | 8.105434 | 1.25E-14 | 5.12E-12  | 22.67838 |
| PCBP1  | 1.079459801  | 10.31027058 | 6.198967 | 1.82E-09 | 7.66E-08  | 11.21529 |
| ANXA5  | 1.082070166  | 9.734071005 | 6.904267 | 2.89E-11 | 2.75E-09  | 15.20004 |
| LYN    | 1.082972435  | 8.701342852 | 7.70216  | 1.84E-13 | 4.83E-11  | 20.07709 |
| HCK    | 1.084836743  | 7.323210948 | 6.637545 | 1.44E-10 | 9.33E-09  | 13.65541 |
| HSPA5  | 1.086669524  | 9.282858122 | 5.176356 | 4.09E-07 | 6.83E-06  | 6.042751 |
| COL4A2 | 1.089786655  | 8.026876704 | 6.071264 | 3.73E-09 | 1.45E-07  | 10.52894 |
| COL3A1 | 1.094895652  | 9.438348095 | 4.299852 | 2.30E-05 | 0.000191  | 2.236103 |
| LAMP3  | 1.097159111  | 6.852129348 | 6.34908  | 7.74E-10 | 3.82E-08  | 12.03618 |
| HLA-G  | 1.108854205  | 9.293610777 | 4.793707 | 2.55E-06 | 3.18E-05  | 4.306389 |
| STAT3  | 1.111832516  | 8.65057599  | 7.692181 | 1.96E-13 | 4.96E-11  | 20.01384 |
| FTL    | 1.113572943  | 12.40624686 | 4.679694 | 4.31E-06 | 4.86E-05  | 3.811096 |
| CTSK   | 1.123122247  | 7.839003642 | 5.543714 | 6.37E-08 | 1.42E-06  | 7.814109 |
| GSTP1  | 1.126329017  | 10.28402016 | 5.201455 | 3.61E-07 | 6.06E-06  | 6.160567 |
| CD19   | 1.126675141  | 7.20452634  | 6.299212 | 1.03E-09 | 4.76E-08  | 11.7618  |
| NPTX2  | 1.13513836   | 6.575358896 | 6.748797 | 7.39E-11 | 5.71E-09  | 14.29424 |
| IFITM3 | 1.152194791  | 10.76331958 | 6.669444 | 1.19E-10 | 8.38E-09  | 13.83777 |

|          |             |             |          |          |          |          |
|----------|-------------|-------------|----------|----------|----------|----------|
| CXCL13   | 1.153861954 | 7.887590928 | 5.140589 | 4.87E-07 | 7.90E-06 | 5.875687 |
| IRF9     | 1.176491624 | 9.33510881  | 7.497966 | 6.95E-13 | 1.38E-10 | 18.79384 |
| SEC13    | 1.180864127 | 9.235349734 | 6.57321  | 2.10E-10 | 1.31E-08 | 13.28959 |
| PAPSS1   | 1.204439642 | 7.989200005 | 6.036788 | 4.51E-09 | 1.68E-07 | 10.34555 |
| ANXA2    | 1.23014694  | 10.10964059 | 5.700935 | 2.79E-08 | 7.41E-07 | 8.602494 |
| MIF      | 1.238902874 | 10.22352147 | 5.024269 | 8.58E-07 | 1.28E-05 | 5.339105 |
| COL6A3   | 1.252231124 | 8.770402005 | 5.280113 | 2.44E-07 | 4.39E-06 | 6.532865 |
| ADM      | 1.266560348 | 9.684623155 | 5.645446 | 3.74E-08 | 9.41E-07 | 8.322206 |
| MMP12    | 1.26751927  | 8.773630868 | 6.776952 | 6.24E-11 | 5.12E-09 | 14.45716 |
| LYZ      | 1.276665665 | 9.232820912 | 5.312867 | 2.07E-07 | 3.82E-06 | 6.689263 |
| VNN1     | 1.277741726 | 6.52488932  | 7.006761 | 1.54E-11 | 1.63E-09 | 15.80539 |
| HYOU1    | 1.284440909 | 8.44901357  | 7.12067  | 7.60E-12 | 9.41E-10 | 16.48566 |
| PLA2G2A  | 1.284590051 | 10.33489923 | 4.654631 | 4.83E-06 | 5.33E-05 | 3.7036   |
| PFKFB3   | 1.285977899 | 7.9545831   | 7.267632 | 3.02E-12 | 4.51E-10 | 17.37482 |
| S100A8   | 1.298480248 | 7.545801111 | 7.548559 | 5.01E-13 | 1.03E-10 | 19.1096  |
| SDCBP    | 1.301386749 | 9.802075313 | 5.309054 | 2.11E-07 | 3.88E-06 | 6.671012 |
| NMI      | 1.304972105 | 8.181971426 | 7.846593 | 7.09E-14 | 2.33E-11 | 20.99871 |
| ISG20    | 1.307784443 | 9.783750948 | 9.083638 | 1.30E-17 | 1.70E-14 | 29.32802 |
| CXCL10   | 1.322263449 | 7.072433668 | 6.326682 | 8.81E-10 | 4.19E-08 | 11.91274 |
| CD74     | 1.341588605 | 9.539177066 | 5.811022 | 1.55E-08 | 4.60E-07 | 9.165085 |
| TUBB2A   | 1.343192583 | 8.615597287 | 6.343139 | 8.01E-10 | 3.92E-08 | 12.00341 |
| SERPINA3 | 1.343794502 | 7.401127103 | 6.236498 | 1.47E-09 | 6.40E-08 | 11.41911 |
| CTSH     | 1.376774135 | 8.732174892 | 5.924891 | 8.35E-09 | 2.81E-07 | 9.756027 |
| PI3      | 1.424114283 | 10.44447154 | 6.691909 | 1.04E-10 | 7.56E-09 | 13.9666  |
| CCL19    | 1.441433819 | 7.745895307 | 5.579002 | 5.30E-08 | 1.25E-06 | 7.989503 |
| REG1B    | 1.455234475 | 8.132124445 | 4.789947 | 2.60E-06 | 3.22E-05 | 4.289891 |
| MMP9     | 1.467399097 | 7.890670263 | 6.869073 | 3.58E-11 | 3.21E-09 | 14.99368 |
| TRIM22   | 1.47097504  | 7.694248481 | 6.987681 | 1.73E-11 | 1.80E-09 | 15.69221 |
| SERPINB5 | 1.51131716  | 7.069203098 | 7.427166 | 1.10E-12 | 2.00E-10 | 18.3544  |
| PRDX1    | 1.513252131 | 11.18213003 | 8.388028 | 1.80E-15 | 1.07E-12 | 24.5518  |
| RARRES3  | 1.518654286 | 9.412875451 | 7.794731 | 1.00E-13 | 2.98E-11 | 20.66647 |
| LCPI     | 1.519202946 | 8.930594713 | 6.570298 | 2.14E-10 | 1.32E-08 | 13.2731  |
| HLA-DMA  | 1.525328238 | 9.493362829 | 7.636194 | 2.83E-13 | 6.20E-11 | 19.65998 |
| C4BPB    | 1.55929331  | 7.319900669 | 10.21055 | 2.83E-21 | 9.27E-18 | 37.50545 |
| DEFA6    | 1.569836163 | 7.781988133 | 5.454736 | 1.01E-07 | 2.12E-06 | 7.375894 |
| SELL     | 1.58783643  | 6.800406791 | 7.376068 | 1.52E-12 | 2.62E-10 | 18.03904 |
| HLA-DRA  | 1.641893058 | 11.20430774 | 6.741682 | 7.72E-11 | 5.82E-09 | 14.25315 |
| REG3A    | 1.669729025 | 7.506283338 | 6.123288 | 2.79E-09 | 1.11E-07 | 10.80721 |
| ASS1     | 1.695967228 | 10.13474749 | 7.187145 | 5.02E-12 | 6.72E-10 | 16.88626 |
| REG1A    | 1.725579356 | 9.119742571 | 5.436587 | 1.11E-07 | 2.28E-06 | 7.287223 |
| S100P    | 1.87180659  | 10.92513489 | 8.165707 | 8.29E-15 | 3.88E-12 | 23.07454 |
| TIMP1    | 1.900681687 | 10.03446095 | 7.676968 | 2.17E-13 | 5.28E-11 | 19.91751 |
| DMBT1    | 1.919044988 | 9.262351259 | 8.959136 | 3.19E-17 | 2.99E-14 | 28.45676 |
| CXCL1    | 1.996764192 | 7.433971676 | 8.701092 | 2.01E-16 | 1.65E-13 | 26.67334 |

|       |             |             |          |          |          |          |
|-------|-------------|-------------|----------|----------|----------|----------|
| DEFA5 | 2.230302233 | 8.436364864 | 7.111482 | 8.05E-12 | 9.61E-10 | 16.4305  |
| LCN2  | 2.504959386 | 10.22767765 | 8.425917 | 1.38E-15 | 9.08E-13 | 24.80603 |
| OLFM4 | 3.086237788 | 10.42001706 | 10.8783  | 1.53E-23 | 1.00E-19 | 42.56959 |

---

**Table.2** The subsequently screened characteristic with LASSO regression.

| Method | Genes    | Condition  | Coef         |
|--------|----------|------------|--------------|
| LASSO  | OLFM4    | lambda.min | 0.14751895   |
| LASSO  | C4BPB    | lambda.min | 0.185487713  |
| LASSO  | DMBT1    | lambda.min | 0.173906139  |
| LASSO  | CLDN8    | lambda.min | -0.053189673 |
| LASSO  | PRDX1    | lambda.min | 0.021082433  |
| LASSO  | S100P    | lambda.min | 0.524508913  |
| LASSO  | NMI      | lambda.min | 0.236032555  |
| LASSO  | RARRES3  | lambda.min | 0.424438671  |
| LASSO  | HLA-DMA  | lambda.min | 0.009897685  |
| LASSO  | HYOU1    | lambda.min | 0.187376225  |
| LASSO  | VNN1     | lambda.min | 0.176034637  |
| LASSO  | NPTX2    | lambda.min | 0.175898179  |
| LASSO  | IFITM3   | lambda.min | -0.313196821 |
| LASSO  | CSF2RB   | lambda.min | 0.152102962  |
| LASSO  | CD19     | lambda.min | 0.291291482  |
| LASSO  | SERPINA3 | lambda.min | -0.075735023 |
| LASSO  | COL4A2   | lambda.min | 0.036256726  |
| LASSO  | CHAD     | lambda.min | -0.277883251 |
| LASSO  | OAZ1     | lambda.min | 0.017195566  |
| LASSO  | PCK1     | lambda.min | -0.111599485 |
| LASSO  | CCL19    | lambda.min | 0.024118438  |
| LASSO  | SPINK4   | lambda.min | -0.042505499 |
| LASSO  | COL6A3   | lambda.min | -0.124202129 |
| LASSO  | HLA-G    | lambda.min | 0.03043852   |
| LASSO  | FTL      | lambda.min | 0.024739742  |
| LASSO  | PLA2G2A  | lambda.min | -0.236351021 |
| LASSO  | CCL21    | lambda.min | 0.017557336  |

**Fig.1** The six DGEs into ROC curve

A. The ROC curve of six DGEs in training group.

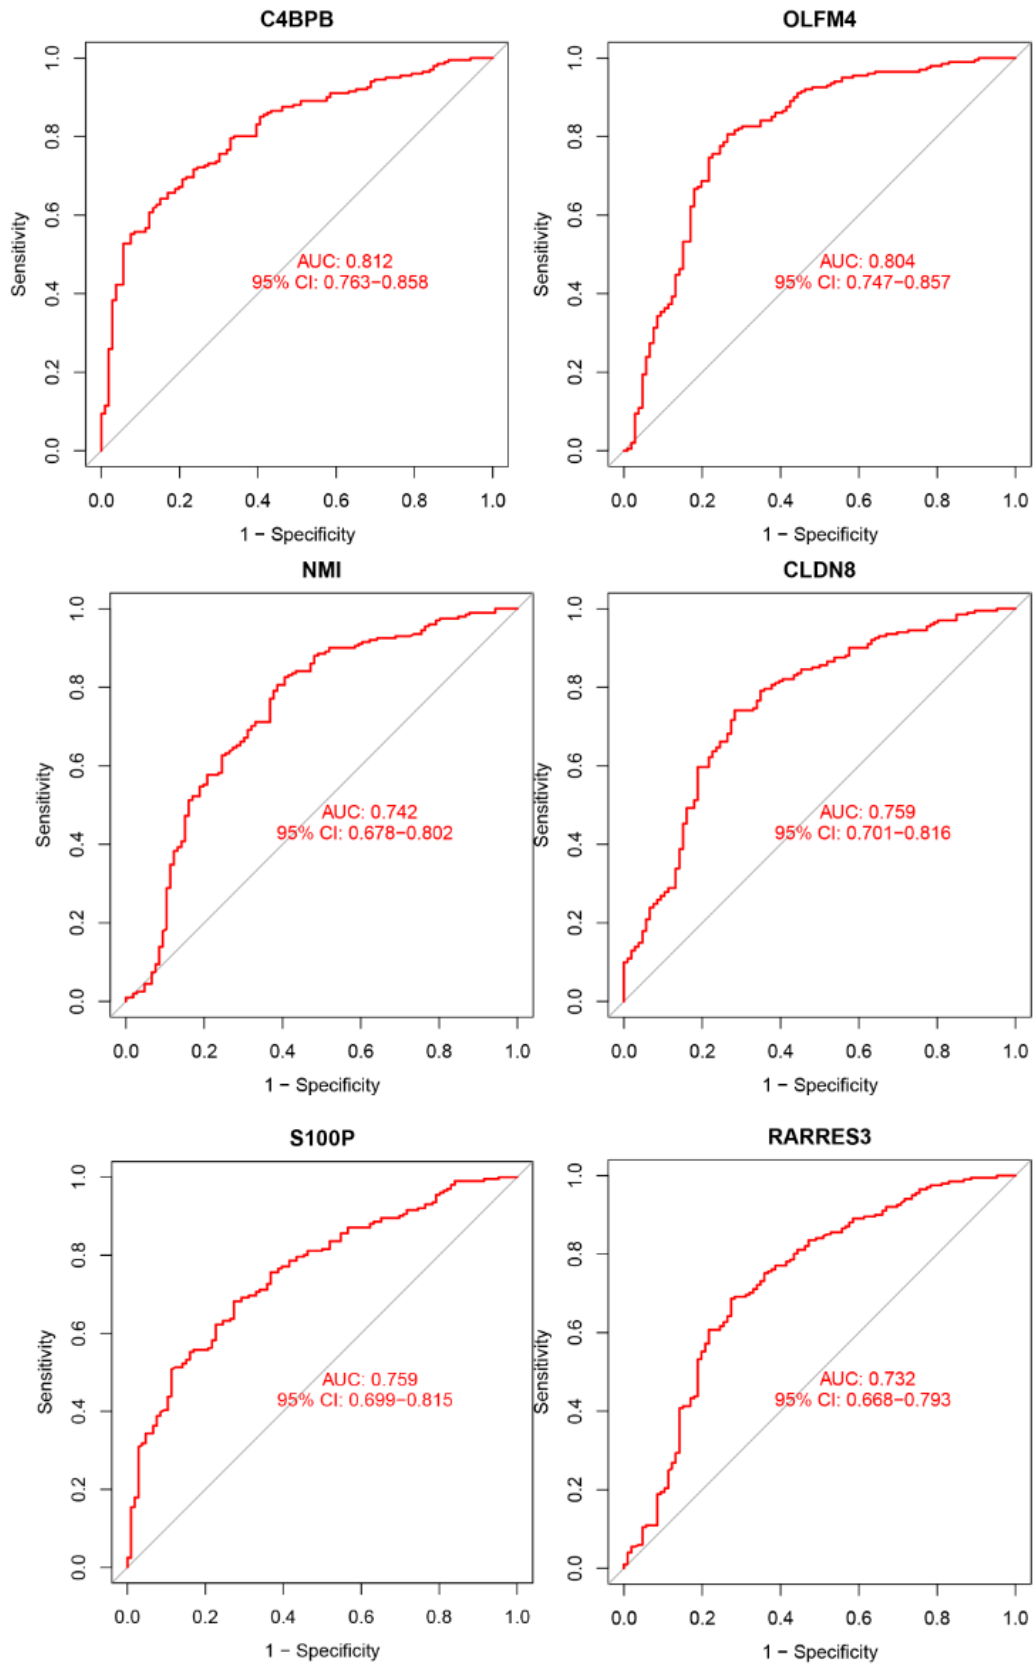

B. The ROC curve of six DGEs in testing group.

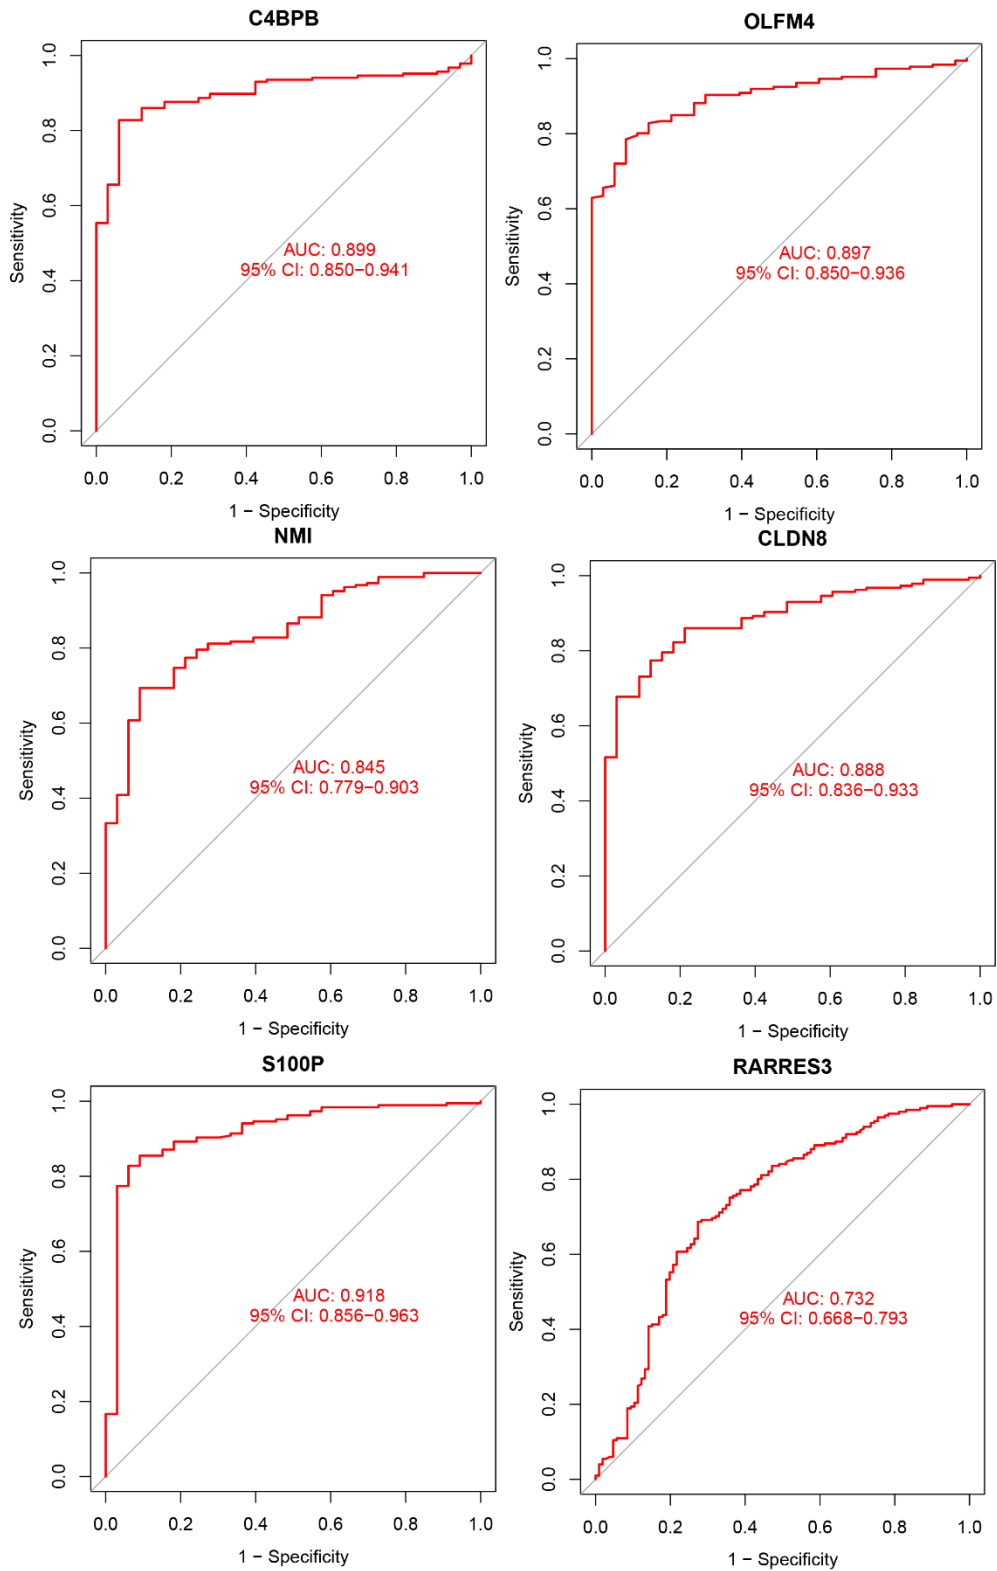



C. The ROC curve of six DGEs in GSE87473 group.

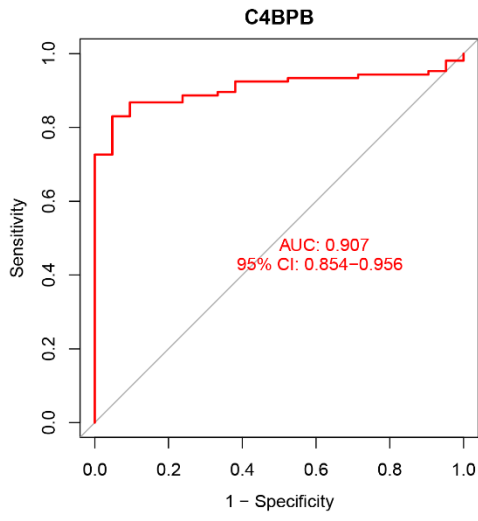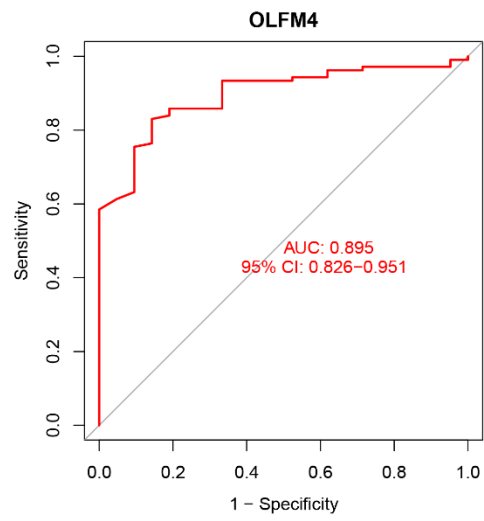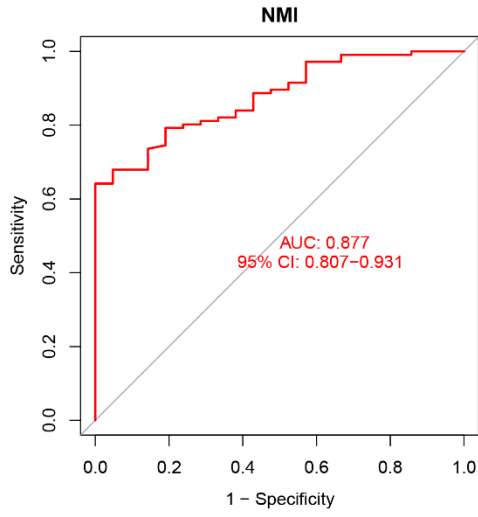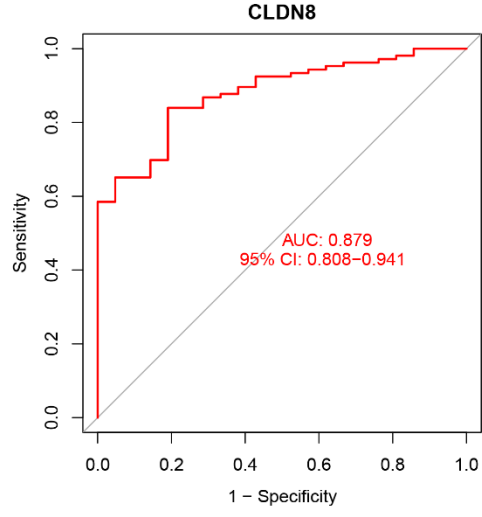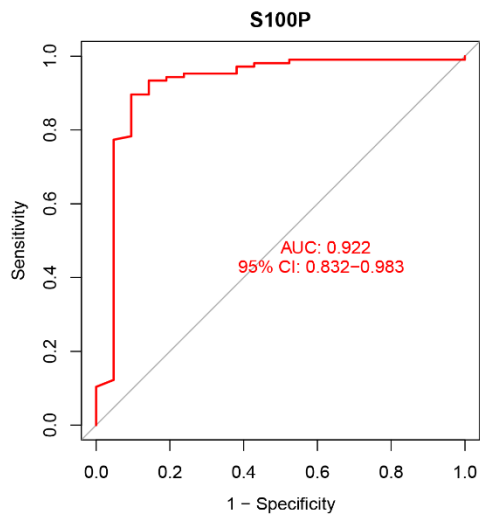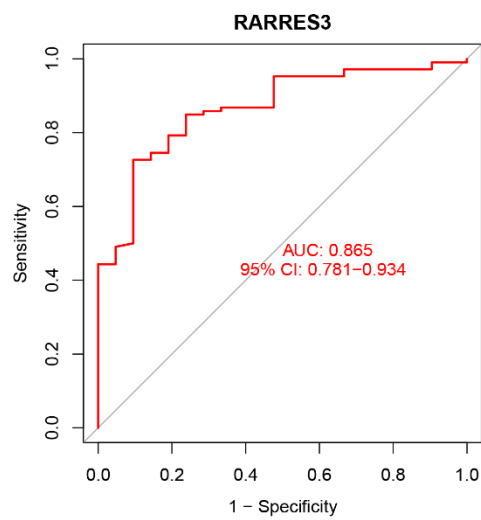

**Table.3** The immune correlation in OLFM4 and C4BPB.

| Gene  | Cell                         | coef         | pvalue      |
|-------|------------------------------|--------------|-------------|
| OLFM4 | B cells naive                | -0.098682612 | 0.106327554 |
| OLFM4 | B cells memory               | 0.004954595  | 0.935534614 |
| OLFM4 | Plasma cells                 | 0.151136038  | 0.013081496 |
| OLFM4 | T cells CD8                  | -0.118165948 | 5.29E-02    |
| OLFM4 | T cells CD4 naive            | 0.133189367  | 2.90E-02    |
| OLFM4 | T cells CD4 memory resting   | -0.027197559 | 0.656986176 |
| OLFM4 | T cells CD4 memory activated | -0.085841775 | 0.160334881 |
| OLFM4 | T cells follicular helper    | 0.026376898  | 6.67E-01    |
| OLFM4 | T cells regulatory (Tregs)   | -0.093293088 | 0.126928802 |
| OLFM4 | T cells gamma delta          | -0.032467321 | 5.96E-01    |
| OLFM4 | NK cells resting             | -0.192686012 | 0.001496417 |
| OLFM4 | NK cells activated           | 0.189085373  | 0.001839848 |
| OLFM4 | Monocytes                    | 0.157076371  | 0.009871913 |
| OLFM4 | Macrophages M0               | 0.222890747  | 2.29E-04    |
| OLFM4 | Macrophages M1               | 0.367895593  | 4.80E-10    |
| OLFM4 | Macrophages M2               | -0.190324381 | 0.001714287 |
| OLFM4 | Dendritic cells resting      | -0.088447117 | 0.147974807 |
| OLFM4 | Dendritic cells activated    | -0.001959623 | 0.97447958  |
| OLFM4 | Mast cells resting           | -0.13683687  | 0.024806174 |
| OLFM4 | Mast cells activated         | 0.132455403  | 0.029863819 |
| OLFM4 | Eosinophils                  | 0.066298832  | 0.278581888 |
| OLFM4 | Neutrophils                  | 0.102593603  | 0.093101747 |
| C4BPB | B cells naive                | -0.191432696 | 0.001608662 |
| C4BPB | B cells memory               | -0.215880883 | 0.000361966 |
| C4BPB | Plasma cells                 | 0.083547767  | 0.171846706 |
| C4BPB | T cells CD8                  | -0.123440541 | 0.043084461 |
| C4BPB | T cells CD4 naive            | 0.00055369   | 0.992788103 |
| C4BPB | T cells CD4 memory resting   | -0.067251168 | 0.271720323 |
| C4BPB | T cells CD4 memory activated | 0.039323204  | 0.520747528 |
| C4BPB | T cells follicular helper    | -0.059376462 | 0.331962951 |
| C4BPB | T cells regulatory (Tregs)   | -0.101394459 | 0.09700943  |
| C4BPB | T cells gamma delta          | -0.16062717  | 0.00830595  |
| C4BPB | NK cells resting             | -0.079715613 | 0.192431426 |
| C4BPB | NK cells activated           | 0.263435637  | 1.20E-05    |
| C4BPB | Monocytes                    | 0.188622811  | 0.00188884  |
| C4BPB | Macrophages M0               | 0.092585534  | 0.12984854  |
| C4BPB | Macrophages M1               | 0.41247558   | 1.79E-12    |
| C4BPB | Macrophages M2               | -0.219571752 | 0.000284678 |
| C4BPB | Dendritic cells resting      | -0.027643745 | 0.651725753 |
| C4BPB | Dendritic cells activated    | 0.10131241   | 0.097281501 |

|       |                      |              |             |
|-------|----------------------|--------------|-------------|
| C4BPB | Mast cells resting   | -0.267854801 | 8.41E-06    |
| C4BPB | Mast cells activated | 0.413919247  | 1.47E-12    |
| C4BPB | Eosinophils          | 0.062619344  | 0.306187078 |
| C4BPB | Neutrophils          | 0.379899356  | 1.16E-10    |

---
